# Supplementary material for: Rational synthesis of Li4Ti5O12/N-C nanotube arrays as advanced high-rate electrodes for lithium-ion batteries
Source: Royal Society of Chemistry journal article supplement (doi:10.1039/c8ta00312b), 2018-01-01
Supplement: c8ta00312b1.pdf [file c8ta00312b1.pdf]

## Electronic Supplementary Information

### **Rational synthesis of $\text{Li}_4\text{Ti}_5\text{O}_{12}$ /N-C nanotube arrays as advanced high-rate electrodes for lithium-ion batteries**

Jun Liu,<sup>a</sup> Ai Xiang Wei,<sup>\*a,b</sup> Minghua Chen,<sup>\*c</sup> Xinhui Xia<sup>\*d</sup>

<sup>a</sup> Guangdong Provincial Key Laboratory of Functional Soft Condensed Matter, School of Materials and Energy, Guangdong University of Technology, Guangzhou 510006, China

<sup>b</sup>Department of Information Science, Xinhua College of Sun Yat-sen University, Guangzhou 510520, China.

<sup>c</sup>Key Laboratory of Engineering Dielectric and Applications (Ministry of Education), Harbin University of Science and Technology, Harbin 150080, P. R. China

<sup>d</sup>State Key Laboratory of Silicon Materials, Key Laboratory of Advanced Materials and Applications for Batteries of Zhejiang Province, and Department of Materials Science and Engineering, Zhejiang University, Hangzhou 310027, P. R. China.

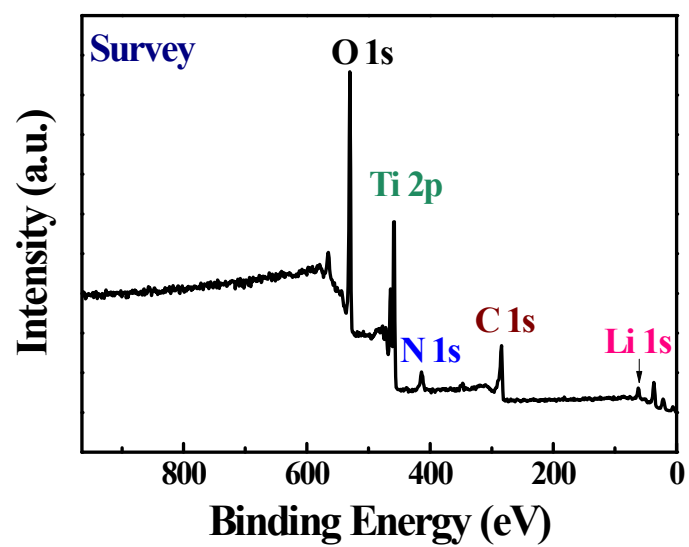

**Figure S1.** XPS survey spectrum of LTO/N-C nanotube arrays
